# Supplementary material for: Combination therapy using human papillomavirus L1/E6/E7 genes and archaeosome: a nanovaccine confer immuneadjuvanting effects to fight cervical cancer
Source: PubMed Central journal article supplement (PMC7113280; doi:10.1038/s41598-020-62448-3), 2020-04-01
Supplement: 41598_2020_62448_MOESM2_ESM.pdf [file 41598_2020_62448_MOESM2_ESM.pdf]

## Supplementary Table S1

**Title:** Combination therapy using human papillomavirus L1/E6/E7 genes and archaeosome: a nanovaccine confer immuneadjuvanting effects to fight cervical cancer

**Hesam Karimi**<sup>1</sup>, **Hoorieh Soleimanjahi**<sup>1\*</sup>, **Asgar Abdoli**<sup>2</sup>, **Razieh Sadat Banijamali**<sup>1</sup>

1. Department of Virology, Faculty of Medical Sciences, Tarbiat Modares University, Tehran, Iran

2. Department of Hepatitis and AIDS, Pasteur Institute of Iran, Tehran, Iran

\* Corresponding Author: Hoorieh Soleimanjahi, PhD; Professor – Tel: [+98] 21 82883561- Email: soleim\_h@modares.ac.ir

Table S1. The amino acid sequences of the antigenic epitopes of the HPV 16 L1, E6, and E7 genes

| Type  | Protein | Sequence of antigenic epitopes |
|-------|---------|--------------------------------|
| HPV16 | L1      | AGVDNRECISMDYKQTQLCLIGCKPPI    |
| HPV16 | E6      | SEYRHYCYSLYGTTLEQQYNKPLCDLL    |
| HPV16 | E7      | RAHYNIVTFRAHYNIVTFRAHYNIVTF    |

To generate the recombinant construct (L1/E6/E7) encoding CTL-epitopes restricted by both human and mouse, the cellular antigenic regions of the human papillomavirus type 16 genes, containing L1, E6 and E7 selected and linked by a spacer of glutamic acid, alanine, alanine, alanine, and lysine. The final synthesized gene sequences (397 bp) encodes a protein with molecular weight of ~14.3 kDa includes 128 amino acid.
